# Supplementary material for: Broken-gap energy alignment in two-dimensional van der Waals heterostructures for multifunctional tunnel diodes
Source: Royal Society of Chemistry journal article supplement (doi:10.1039/d4cp01174k), 2024-01-01
Supplement: d4cp01174k1.pdf [file d4cp01174k1.pdf]

# Broken-gap Energy Alignment in Two-dimensional van der Waals Heterostructures for Multifunctional Tunnel Diodes

Patrick David Taylor,<sup>a</sup> Sherif Abdulkader Tawfik<sup>b</sup> and Michelle J.S. Spencer<sup>\*a</sup>

---

<sup>a</sup>*School of Science, RMIT University, GPO Box 2476, Melbourne, Victoria, 3001, Australia.*

<sup>b</sup>*Applied Artificial Intelligence Institute, Deakin University, Victoria, Australia*

\*E-mail: michelle.spencer@rmit.edu.au

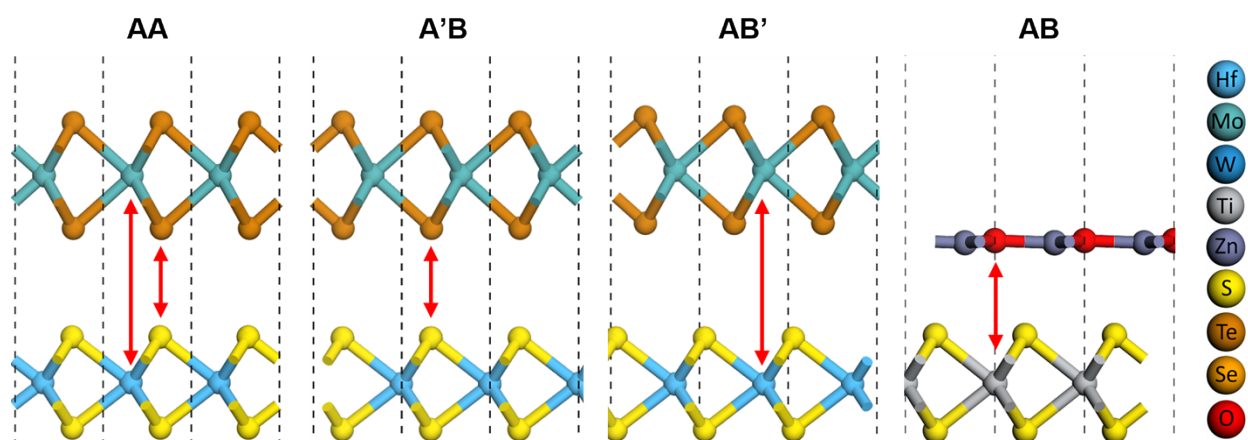

Figure S1. The 3 high symmetry stacking patterns, AA, A'B and AB', considered for HfS<sub>2</sub>/MoTe<sub>2</sub>, HfS<sub>2</sub>/WTe<sub>2</sub>, TiS<sub>2</sub>/WSe<sub>2</sub> and TiSe<sub>2</sub>/WTe<sub>2</sub>, and AA, AB' and AB, considered for 1T-HfS<sub>2</sub>/WTe<sub>2</sub> and TiS<sub>2</sub>/ZnO.

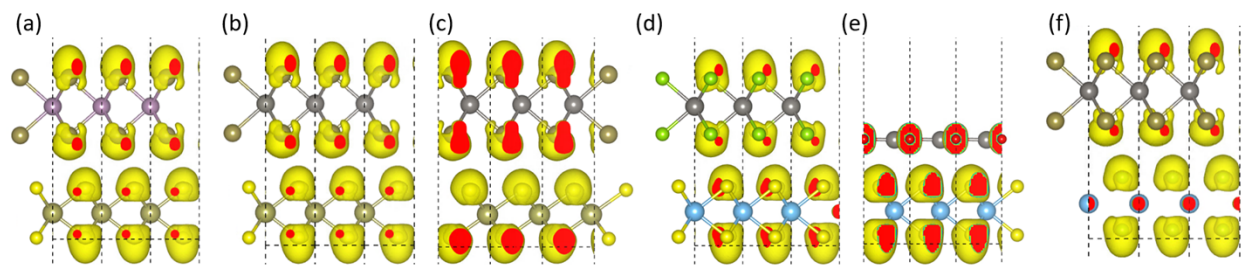

Figure S2. Electron localisation function isosurface plots of (a)  $\text{HfS}_2/\text{MoTe}_2$ , (b)  $\text{HfS}_2/\text{WTe}_2$ , (c) 1T- $\text{HfS}_2/\text{WTe}_2$ , (d)  $\text{TiS}_2/\text{WSe}_2$ , (e)  $\text{TiS}_2/\text{ZnO}$  and (f)  $\text{TiSe}_2/\text{WTe}_2$ .

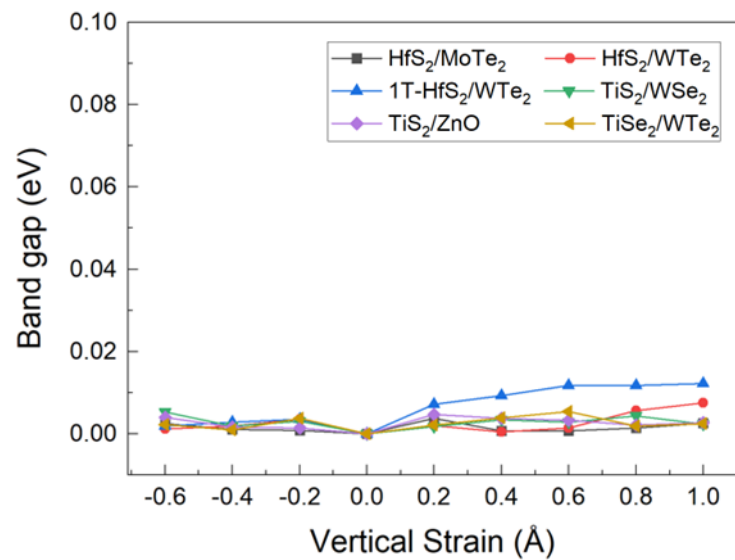

Figure S3. Calculated band gap as a function of vertical strain for the 6 heterostructures.
